# Supplementary material for: Synthesis, structures, and magnetic properties of a family of 3d–4f [Na2Fe6Ln2] complexes (Ln = Y, Gd and Dy): effect of ligands on the connection of inorganic subunits
Source: Royal Society of Chemistry journal article supplement (doi:10.1039/c2dt31050c), 2012-10-31
Supplement: c2dt31050c.pdf [file c2dt31050c.pdf]

## Supporting Information

# Synthesis, Structures, and Magnetic Properties of Three 3d-4f [Na<sub>2</sub>Fe<sup>III</sup><sub>6</sub>Dy<sup>III</sup><sub>2</sub>] Complexes: Effect of Organic Ligands on the Connection of Inorganic Subunits

Qi Zhou,<sup>a</sup> Fen Yang,<sup>a</sup> Dan Liu,<sup>b</sup> Yu Peng,<sup>a</sup> Guanghua Li<sup>\*a</sup>, Zhan Shi<sup>\*a</sup> and Shouhua Feng<sup>a</sup>

<sup>a</sup> State Key Laboratory of Inorganic Synthesis & Preparative Chemistry, College of Chemistry, Jilin University, Changchun 130012, P. R. China. E-mail: leegh@jlu.edu.cn, zshi@mail.jlu.edu.cn.  
Phone: +86-431-85168317. Fax: +86-431-85168624.

<sup>b</sup> State Key Laboratory of Rare Earth Resource Utilization, Changchun Institute of Applied Chemistry, Chinese Academy of Sciences, Changchun 130022, China.

**Table S1.** Selected bond lengths (Å) for complex **1**

|             |          |              |           |
|-------------|----------|--------------|-----------|
| Dy(1)-O(8)  | 2.312(5) | Fe(4)-O(11)  | 1.943(6)  |
| Dy(1)-O(3)  | 2.320(5) | Fe(4)-O(36)  | 1.972(6)  |
| Dy(1)-O(29) | 2.329(6) | Fe(4)-N(11)  | 1.987(7)  |
| Dy(1)-O(27) | 2.333(5) | Fe(4)-O(12)  | 2.025(6)  |
| Dy(1)-O(25) | 2.355(5) | Fe(4)-N(3)   | 2.097(8)  |
| Dy(1)-O(22) | 2.366(6) | Fe(4)-O(34)  | 2.113(5)  |
| Dy(1)-O(23) | 2.414(5) | Fe(5)-O(16)  | 1.927(7)  |
| Dy(1)-O(24) | 2.580(6) | Fe(5)-N(14)  | 1.979(15) |
| Dy(2)-O(30) | 2.277(6) | Fe(5)-O(36)  | 2.002(6)  |
| Dy(2)-O(18) | 2.285(6) | Fe(5)-N(14') | 2.00(3)   |
| Dy(2)-O(26) | 2.298(7) | Fe(5)-O(17)  | 2.017(7)  |
| Dy(2)-O(28) | 2.309(6) | Fe(5)-N(4)   | 2.121(8)  |
| Dy(2)-O(13) | 2.316(5) | Fe(5)-O(34)  | 2.141(5)  |
| Dy(2)-O(24) | 2.352(6) | Fe(6)-O(18)  | 1.941(5)  |
| Dy(2)-O(31) | 2.370(7) | Fe(6)-O(13)  | 1.950(6)  |
| Fe(1)-O(1)  | 1.932(6) | Fe(6)-O(17)  | 1.972(7)  |
| Fe(1)-N(5)  | 1.978(8) | Fe(6)-O(32)  | 2.001(6)  |
| Fe(1)-O(35) | 1.997(6) | Fe(6)-O(12)  | 2.009(5)  |
| Fe(1)-O(2)  | 2.013(6) | Fe(6)-O(34)  | 2.102(5)  |
| Fe(1)-O(33) | 2.121(5) | Na(1)-O(37)  | 2.277(8)  |
| Fe(1)-N(1)  | 2.136(7) | Na(1)-O(6)   | 2.372(7)  |
| Fe(2)-O(6)  | 1.926(6) | Na(1)-O(1)   | 2.378(6)  |
| Fe(2)-N(8)  | 1.993(9) | Na(1)-O(10)  | 2.379(8)  |
| Fe(2)-O(35) | 1.998(6) | Na(1)-O(5)   | 2.399(8)  |
| Fe(2)-O(7)  | 1.999(6) | Na(1)-O(35)  | 2.870(7)  |
| Fe(2)-O(33) | 2.130(5) | Na(2)-O(38') | 2.231(19) |
| Fe(2)-N(2)  | 2.142(7) | Na(2)-O(16)  | 2.338(6)  |
| Fe(3)-O(8)  | 1.939(5) | Na(2)-O(11)  | 2.349 (7) |
| Fe(3)-O(3)  | 1.947(5) | Na(2)-O(38)  | 2.35(2)   |
| Fe(3)-O(2)  | 1.989(5) | Na(2)-O(20)  | 2.411(7)  |
| Fe(3)-O(21) | 2.000(6) | Na(2)-O(15)  | 2.475(7)  |
| Fe(3)-O(7)  | 2.007(5) | Na(2)-O(36)  | 2.809(7)  |
| Fe(3)-O(33) | 2.098(6) |              |           |

**Table S2.** Selected bond lengths (Å) for complex **2**

|               |           |             |           |
|---------------|-----------|-------------|-----------|
| Dy(1)-O(12)   | 2.284(6)  | Fe(2)-O(11) | 2.022(8)  |
| Dy(1)-O(15)#1 | 2.305(6)  | Fe(2)-N(7)  | 2.130(9)  |
| Dy(1)-O(6)    | 2.331(5)  | Fe(2)-O(10) | 2.142(6)  |
| Dy(1)-O(3)    | 2.334(6)  | Fe(3)-O(5)  | 1.942(8)  |
| Dy(1)-O(13)#1 | 2.337(6)  | Fe(3)-N(6)  | 1.988(11) |
| Dy(1)-O(14)   | 2.345(6)  | Fe(3)-O(7)  | 2.019(6)  |
| Dy(1)-O(17)   | 2.380(6)  | Fe(3)-O(11) | 2.021(8)  |
| Fe(1)-O(3)    | 1.954(6)  | Fe(3)-N(8)  | 2.124(9)  |
| Fe(1)-O(6)    | 1.977(6)  | Fe(3)-O(10) | 2.126(6)  |
| Fe(1)-O(7)    | 2.001(6)  | Na(1)-O(9)  | 2.29(4)   |
| Fe(1)-O(2)    | 2.008(6)  | Na(1)-O(5)  | 2.370(12) |
| Fe(1)-O(16)   | 2.011(6)  | Na(1)-O(1)  | 2.409(13) |
| Fe(1)-O(10)   | 2.104(6)  | Na(1)-O(4)  | 2.442(16) |
| Fe(2)-O(1)    | 1.936(8)  | Na(1)-O(8)  | 2.461(16) |
| Fe(2)-O(2)    | 2.009(6)  | Na(1)-O(11) | 2.732(9)  |
| Fe(2)-N(1)    | 2.017(12) |             |           |

Symmetry transformations used to generate equivalent atoms: #1 -x+1,-y+2,-z+1

**Table S3.** Selected bond lengths (Å) for complex **3**

|               |           |              |           |
|---------------|-----------|--------------|-----------|
| Dy(1)-O(15)   | 2.167(5)  | Fe(2)-O(6)   | 2.071(5)  |
| Dy(1)-O(16)#1 | 2.236(5)  | Fe(2)-O(9)   | 2.143(5)  |
| Dy(1)-O(7)    | 2.314(5)  | Fe(2)-N(2)   | 2.152(7)  |
| Dy(1)-O(3)    | 2.335(4)  | Fe(3)-O(3)   | 1.909(5)  |
| Dy(1)-O(12)   | 2.352(5)  | Fe(3)-O(6)   | 1.990(5)  |
| Dy(1)-O(14)#1 | 2.418(7)  | Fe(3)-O(11)  | 1.992(5)  |
| Dy(1)-O(13)   | 2.460(6)  | Fe(3)-O(7)   | 2.007(5)  |
| Fe(1)-O(1)    | 1.861(6)  | Fe(3)-O(2)   | 2.056(5)  |
| Fe(1)-O(2)    | 2.001(5)  | Fe(3)-O(9)   | 2.130(5)  |
| Fe(1)-O(10)   | 2.046(7)  | Na(1)-O(4)   | 2.261(9)  |
| Fe(1)-N(3)    | 2.063(8)  | Na(1)-N(5)#2 | 2.349(11) |
| Fe(1)-N(1)    | 2.153(7)  | Na(1)-O(5)   | 2.370(8)  |
| Fe(1)-O(9)    | 2.184(5)  | Na(1)-O(1)   | 2.561(9)  |
| Fe(2)-N(6)    | 1.927(11) | Na(1)-O(8)   | 2.617(10) |
| Fe(2)-O(5)    | 1.948(6)  | Na(1)-O(10)  | 2.691(7)  |
| Fe(2)-O(10)   | 2.043(6)  |              |           |

Symmetry transformations used to generate equivalent atoms: #1 -x+1,-y+2,-z+1 #2 x,-y+3/2,z+1/2

**Table S4.** Selected bond lengths (Å) for complex **4**

|             |          |             |          |
|-------------|----------|-------------|----------|
| Y(1)-O(12)  | 2.271(5) | Fe(2)-O(11) | 2.016(5) |
| Y(1)-O(15)  | 2.283(4) | Fe(2)-N(7)  | 2.124(5) |
| Y(1)-O(13)  | 2.308(4) | Fe(2)-O(10) | 2.151(4) |
| Y(1)-O(6)   | 2.313(4) | Fe(3)-N(6)  | 1.986(6) |
| Y(1)-O(3)   | 2.326(4) | Fe(3)-O(5)  | 1.938(5) |
| Y(1)-O(14)  | 2.331(4) | Fe(3)-O(7)  | 2.013(4) |
| Y(1)-O(17)  | 2.356(4) | Fe(3)-O(11) | 2.014(5) |
| Fe(1)-O(3)  | 1.948(4) | Fe(3)-N(8)  | 2.119(6) |
| Fe(1)-O(6)  | 1.976(4) | Fe(3)-O(10) | 2.121(4) |
| Fe(1)-O(2)  | 2.003(4) | Na(1)-O(9)  | 2.45(3)  |
| Fe(1)-O(7)  | 2.001(4) | Na(1)-O(1)  | 2.418(7) |
| Fe(1)-O(10) | 2.094(4) | Na(1)-O(5)  | 2.380(7) |
| Fe(1)-O(16) | 2.016(4) | Na(1)-O(4)  | 2.452(8) |
| Fe(2)-O(1)  | 1.926(5) | Na(1)-O(8)  | 2.457(9) |
| Fe(2)-N(1)  | 2.006(8) | Na(1)-O(11) | 2.696(6) |
| Fe(2)-O(2)  | 2.006(4) |             |          |

**Table S5.** Selected bond lengths (Å) for complex **5**

|             |          |             |           |
|-------------|----------|-------------|-----------|
| Gd(1)-O(15) | 2.316(4) | Fe(2)-O(9)  | 2.016(6)  |
| Gd(1)-O(7)  | 2.347(4) | Fe(2)-O(10) | 2.119(5)  |
| Gd(1)-O(16) | 2.347(5) | Fe(2)-N(2)  | 2.119(6)  |
| Gd(1)-O(3)  | 2.370(5) | Fe(3)-O(1)  | 1.933(7)  |
| Gd(1)-O(17) | 2.370(5) | Fe(3)-O(9)  | 2.007(7)  |
| Gd(1)-O(14) | 2.375(4) | Fe(3)-N(3)  | 2.010(9)  |
| Gd(1)-O(13) | 2.409(4) | Fe(3)-O(2)  | 2.007(6)  |
| Fe(1)-O(3)  | 1.932(5) | Fe(3)-O(10) | 2.129(5)  |
| Fe(1)-O(7)  | 1.965(4) | Fe(3)-N(1)  | 2.137(9)  |
| Fe(1)-O(6)  | 1.989(5) | Na(1)-O(11) | 2.339(14) |
| Fe(1)-O(12) | 1.998(5) | Na(1)-O(5)  | 2.352(8)  |
| Fe(1)-O(2)  | 2.017(5) | Na(1)-O(1)  | 2.414(12) |
| Fe(1)-O(10) | 2.105(5) | Na(1)-O(8)  | 2.436(12) |
| Fe(2)-O(5)  | 1.945(6) | Na(1)-O(4)  | 2.442(15) |
| Fe(2)-N(6)  | 1.951(9) | Na(1)-O(9)  | 2.705(7)  |
| Fe(2)-O(6)  | 2.020(5) |             |           |

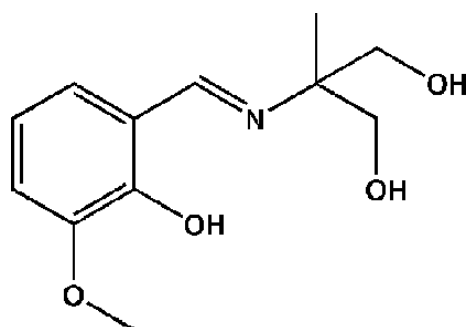

**Scheme S1.** Schiff base ligand  $H_3L$ .

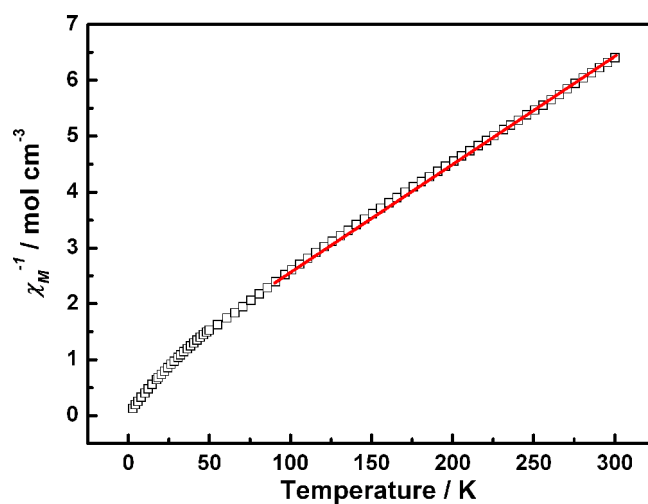

**Fig.S1.** Plots of the temperature dependence of  $\chi_M^{-1}$  for **1** at 1000 Oe. The red line is a simulation of the experimental data.

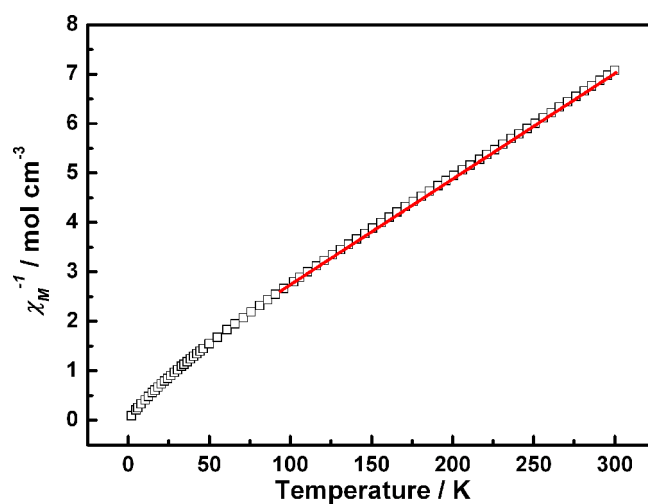

**Fig.S2.** Plots of the temperature dependence of  $\chi_M^{-1}$  for **2** at 1000 Oe. The red line is a simulation of the experimental data.

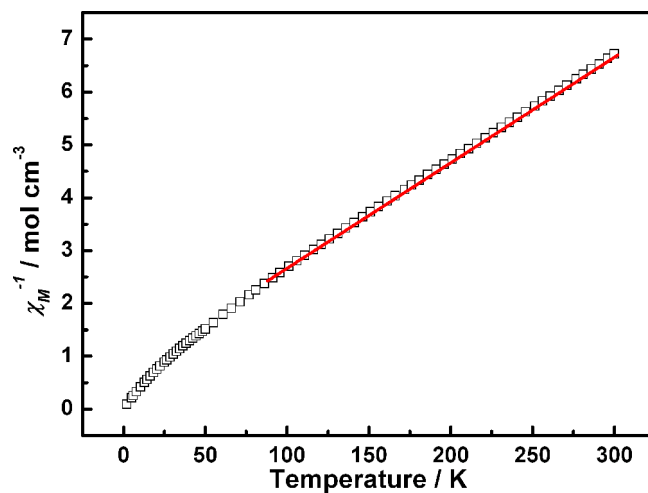

**Fig.S3.** Plots of the temperature dependence of  $\chi_M^{-1}$  for **3** at 1000 Oe. The red line is a simulation of the experimental data.

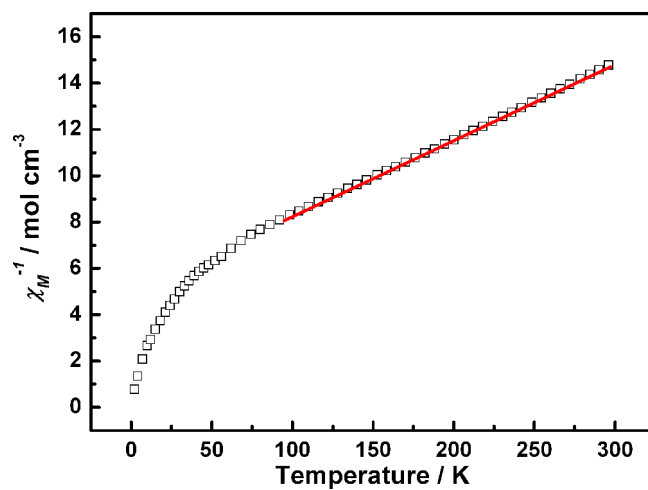

**Fig.S4.** Plots of the temperature dependence of  $\chi_M^{-1}$  for **4** at 1000 Oe. The red line is a simulation of the experimental data.

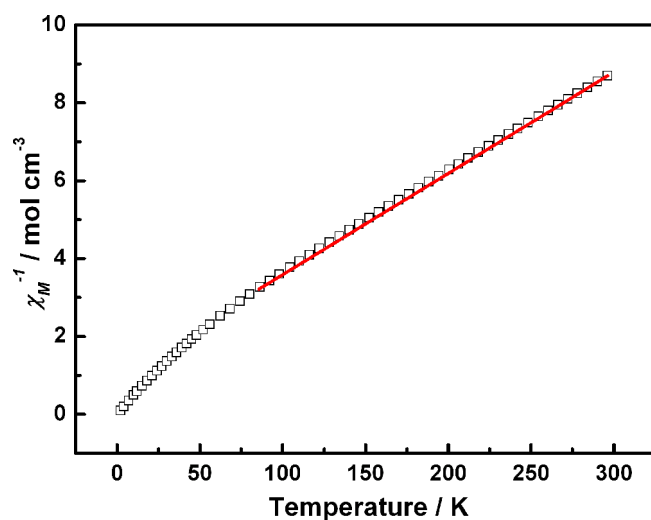

**Fig.S5.** Plots of the temperature dependence of  $\chi_M^{-1}$  for **5** at 1000 Oe. The red line is a simulation of the experimental data.

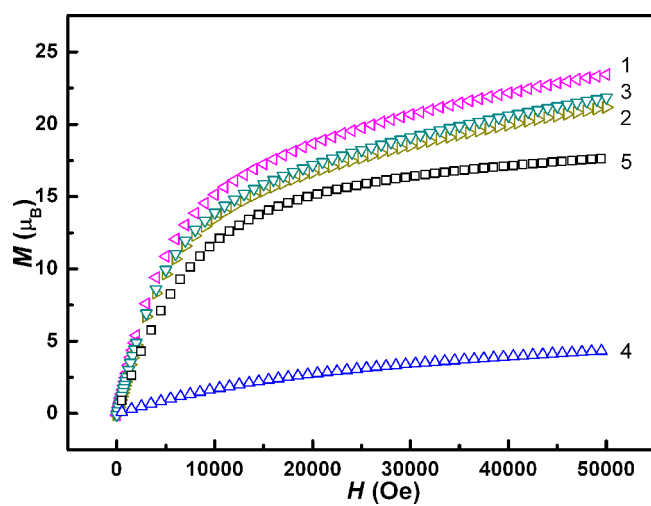

**Fig.S6.** Field dependence of the magnetization for compounds **1-5** at 2K.

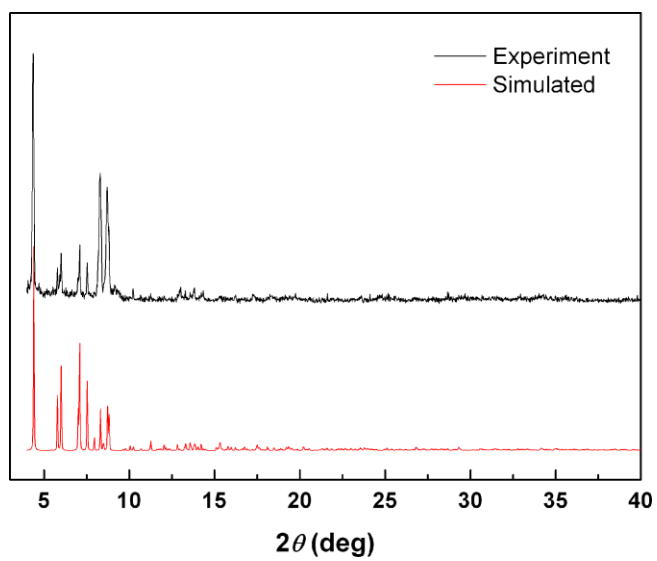

**Figure S7.** XRPD pattern for compound 1.

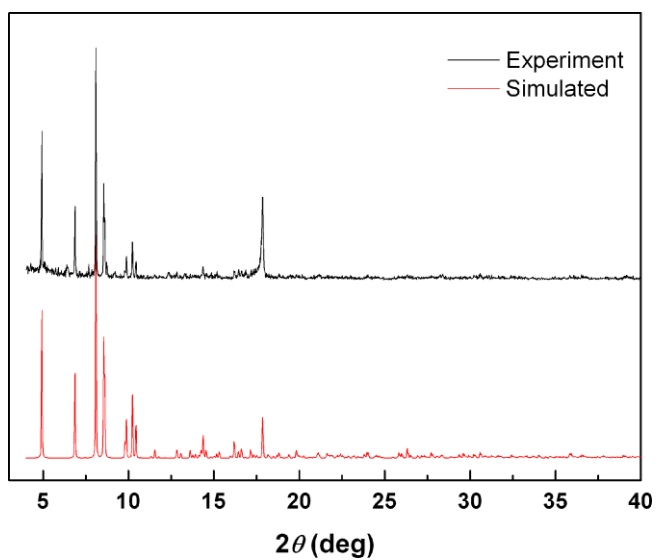

**Figure S8.** XRPD pattern for compound 2.



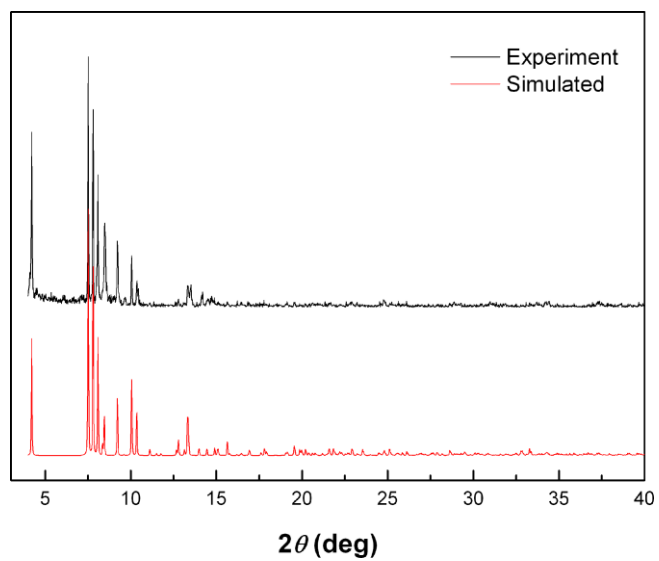

**Figure S9.** XRPD pattern for compound 3.

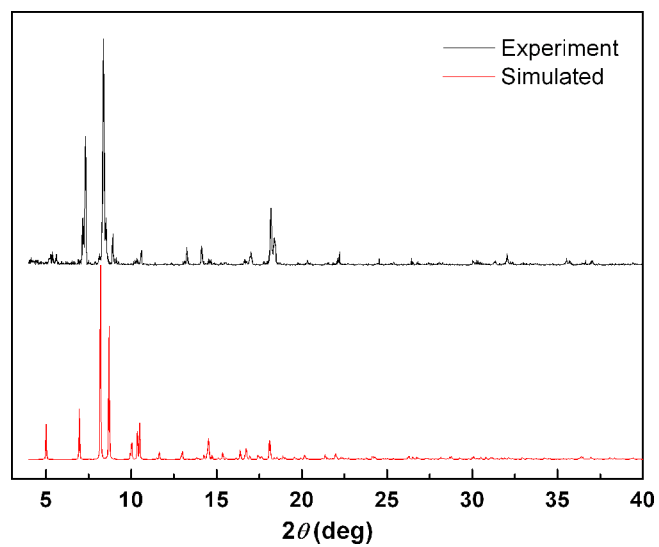

**Figure S10.** XRPD pattern for compound 4.

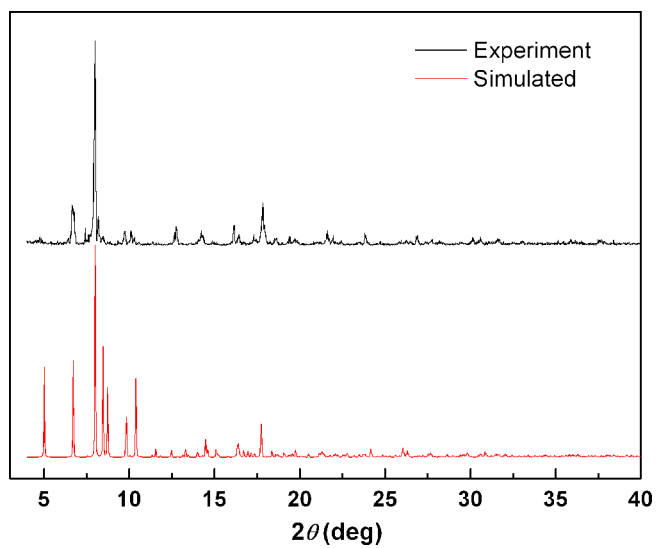

**Figure S11.** XRPD pattern for compound **5**.
